# Supplementary material
Source: PubMed Central journal article supplement (PMC3932746)
Supplement: NIHMS549110-supplement-Supplementary_Material.pdf [file NIHMS549110-supplement-Supplementary_Material.pdf]

## Supplementary Online Content

Cohen E, Jovcevska V, Kuo DZ, Mahant S. Hospital-based comprehensive care programs for children with special health care needs: a systematic review. *Arch Pediatr Adolesc Med.* 2011;165(6):554-561.

**eTable 1.** Example of Search Strategy (Ovid MEDLINE)

**eTable 2.** Characteristics and Evaluation of Programs Meeting Inclusion Criteria (Expansion of Table 1 and Table 2)

This supplementary material has been provided by the authors to give readers additional information about their work.

## eTable 1. Example of Search Strategy (Ovid MEDLINE)

Arthritis/ or exp arthritis, rheumatoid/ or Cerebral Palsy/ or exp Anemia, Sickle Cell/ or exp Diabetes Mellitus/ or exp Asthma/ or Cystic Fibrosis/ or exp Spinal Dysraphism/ or exp HIV/ or exp hiv infections/ or kidney failure, chronic/ or exp renal insufficiency, chronic/ or exp Mental Retardation/ or Short Bowel Syndrome/ or chronic disease/ or disabled child/ or (special adj2 need:).ti,ab. or (medical: adj2 complex:).ti,ab. or (technolog: adj2 dependen:).ti,ab. or (medical: adj2 fragil:).ti,ab. or (complex adj2 need:).ti,ab. (1048522)

Patient Transfer/ or exp Patient Care Management/ or health services accessibility/ or (medical adj2 home:).ti,ab. or ((care adj2 coordinat:) or (care adj2 co-ordinat:)).ti,ab. or (case adj2 manage:).ti,ab. (425432)

1 and 2 (36377)

Limit 3 to "all child (0 to 18 years)" (8599)

Pediatrics/ or (pediatric: or paediatric: or child: or infan: or teen: or adolescen: or (young adj2 adult:)).mp. (2742567)

3 and 5 (9602)

4 or 6 (9602)

Limit 7 to (evaluation studies or validation studies) (298)

Evaluation studies as topic/ or clinical trials as topic/ or program evaluation/ or validation studies as topic/ or clinical trial.pt. or clinical trial, phase i.pt. or clinical trial, phase ii.pt. or clinical trial, phase iii.pt. or clinical trial, phase iv.pt. or controlled clinical trial.pt. or meta-analysis.pt. or multicenter study.pt. or randomized controlled trial.pt. or exp clinical trials as topic/ (934057)

7 and 9 (1333)

8 or 10 (1501)

Limit 11 to yr="2008 -Current" (398)

**eTable 2.** Characteristics and Evaluation of Programs Meeting Inclusion Criteria  
(Expansion of Table 1 and Table 2)

| Program                                                                   | Patient Population       | Intervention/Control*                                                                                                                                                                                                                                                                                                                     | Study Design | Quality Rating (out of 36) | Outcomes (quality main; results)                                                                                                                                                                                                                                                                                                                                                                                                                        |
|---------------------------------------------------------------------------|--------------------------|-------------------------------------------------------------------------------------------------------------------------------------------------------------------------------------------------------------------------------------------------------------------------------------------------------------------------------------------|--------------|----------------------------|---------------------------------------------------------------------------------------------------------------------------------------------------------------------------------------------------------------------------------------------------------------------------------------------------------------------------------------------------------------------------------------------------------------------------------------------------------|
| <b>(A) Categorical Patient Populations</b>                                |                          |                                                                                                                                                                                                                                                                                                                                           |              |                            |                                                                                                                                                                                                                                                                                                                                                                                                                                                         |
| Early Hospital Discharge & Home Follow-Up, Philadelphia, PA <sup>25</sup> | Low birth weight infants | <ul style="list-style-type: none"> <li>○ Home follow-up care from RN after early discharge</li> <li>○ Promoting interaction between parent/infant &amp; education</li> <li>○ Control group: standard discharge</li> </ul>                                                                                                                 | RCT          | 27                         | <ul style="list-style-type: none"> <li>• Length of Hospital Stay (e1/e2; ↓)</li> <li>• Physical Development (e1; ∅)</li> <li>• Re-hospitalization (e1/e2; ∅)</li> <li>• Acute care visits (e1/e2; ∅)</li> <li>• Program Cost (e2; ↓)</li> <li>• Physicians' Charge (e2; ↓)</li> </ul>                                                                                                                                                                   |
| Comprehensive Follow-Up Care, Dallas, TX, USA <sup>26</sup>               | Low birth weight infants | <ul style="list-style-type: none"> <li>○ Comprehensive care <ul style="list-style-type: none"> <li>▪ Well-baby &amp; chronic illness care</li> <li>▪ RN or MD available 24 hours for acute problems</li> <li>▪ Home visits</li> </ul> </li> <li>○ Control group: routine follow-up care (well-baby &amp; chronic illness care)</li> </ul> | RCT          | 30                         | <ul style="list-style-type: none"> <li>• Treatment Compliance (e1; ↑)</li> <li>• Emergency Department Visits (e1/e2 ↓)</li> <li>• Life Threatening Illness (e1/s; ↓)</li> <li>• Intensive Care Services (e1; ↓)</li> <li>• Intensive Care Admissions (e1/e2; ↓)</li> <li>• Days in Intensive Care Unit (e1/e2; ↓)</li> <li>• Program Cost (e2; ↓)</li> <li>• Deaths (e1/s; ∅)</li> <li>• Hospital Admissions (e1/e2; ∅)</li> <li>• Length of</li> </ul> |

|                                                                                                              |                 |                                                                                                                                                                                                                                                                                                                                                                                                                                                                                        |     |    | Hospital Stay<br>(e1/e2; ∅)                                                                                                                                                                                                                                                                                 |
|--------------------------------------------------------------------------------------------------------------|-----------------|----------------------------------------------------------------------------------------------------------------------------------------------------------------------------------------------------------------------------------------------------------------------------------------------------------------------------------------------------------------------------------------------------------------------------------------------------------------------------------------|-----|----|-------------------------------------------------------------------------------------------------------------------------------------------------------------------------------------------------------------------------------------------------------------------------------------------------------------|
| The Pediatric Asthma Intervention, Chicago, IL, USA <sup>27</sup>                                            | Asthma          | <ul style="list-style-type: none"> <li>○ Reinforced Asthma Education <ul style="list-style-type: none"> <li>▪ Monthly contact by team &amp; encouragement to call &amp; ask questions</li> </ul> </li> <li>○ Reinforced Asthma Education &amp; Case Management <ul style="list-style-type: none"> <li>▪ In addition, action plan provided</li> <li>▪ Nurse practitioner available for other issues</li> </ul> </li> <li>○ Control group: 1 individualized education session</li> </ul> | RCT | 25 | <ul style="list-style-type: none"> <li>• Clinic Visits (e1/e2; ↓)</li> <li>• Hospital Admissions (e1/e2; ∅)</li> <li>• Length of Hospital Stay (e1/e2; ∅)</li> <li>• Emergency Department Visits (e1/e2; ∅)</li> <li>• Health Care Reimbursement (e2; ∅)</li> <li>• Program Cost Savings (e2; ∅)</li> </ul> |
| Education & Telephone Case Management for Children with Type 1 Diabetes, Philadelphia, PA, USA <sup>28</sup> | Type 1 diabetes | <ul style="list-style-type: none"> <li>○ Education &amp; Telephone Case Management intervention <ul style="list-style-type: none"> <li>▪ Review guidelines, health &amp; safety</li> <li>▪ Problem solve</li> <li>▪ Meal planning</li> <li>▪ Behaviour &amp; parenting</li> </ul> </li> <li>○ Single education session &amp; customized written guides intervention</li> <li>○ Control group: standard care</li> </ul>                                                                 | RCT | 31 | <ul style="list-style-type: none"> <li>• Adherence to Treatment (e1; ↑)</li> <li>• Parent/Child Teamwork for Disease Management (p; ↑)</li> <li>• Parents' Knowledge of Child's Condition (p; ∅)</li> <li>• Glycemic Control (e2; ∅)</li> </ul>                                                             |
| Care Ambassador Program, Boston, MA, USA <sup>29</sup>                                                       | Type 1 diabetes | <ul style="list-style-type: none"> <li>○ Care Ambassador provided <ul style="list-style-type: none"> <li>▪ Care coordination (appointment scheduling,</li> </ul> </li> </ul>                                                                                                                                                                                                                                                                                                           | RCT | 28 | <ul style="list-style-type: none"> <li>• Severe Hypoglycemia (e1/s; ↓)</li> <li>• Hospital Admissions (e1/e2; ↓)</li> <li>• Emergency</li> </ul>                                                                                                                                                            |

|                                                                                                   |                          |                                                                                                                                                                                                                                                                                                                                                                                                                                           |     |    |                                                                                                                                                                                                                            |
|---------------------------------------------------------------------------------------------------|--------------------------|-------------------------------------------------------------------------------------------------------------------------------------------------------------------------------------------------------------------------------------------------------------------------------------------------------------------------------------------------------------------------------------------------------------------------------------------|-----|----|----------------------------------------------------------------------------------------------------------------------------------------------------------------------------------------------------------------------------|
|                                                                                                   |                          | <p>addressing questions, direct families to resources)</p> <ul style="list-style-type: none"> <li>▪ Clinic attendance monitoring with outreach for missed appointments</li> <li>○ Care Ambassador plus provided additional <ul style="list-style-type: none"> <li>▪ Psycho-education with written material</li> <li>▪ Time per visit spent with patients</li> </ul> </li> <li>○ Control group: standard multidisciplinary care</li> </ul> |     |    | <p>Department Visits (e1/e2; ↓)</p> <ul style="list-style-type: none"> <li>• Glycemic Control (e2; ↑)</li> </ul>                                                                                                           |
| The Pediatric Asthma Center Comprehensive Inner-City Asthma Program, Bronx, NY, USA <sup>30</sup> | Asthma                   | <ul style="list-style-type: none"> <li>○ Multidisciplinary, hospital-based specialty clinic <ul style="list-style-type: none"> <li>▪ Provided intensive medical &amp; environmental control, education &amp; monitoring</li> <li>▪ 24 hour availability</li> </ul> </li> <li>○ Control group: care continued by other health resources</li> </ul>                                                                                         | RCT | 32 | <ul style="list-style-type: none"> <li>• Emergency Department Visits (e1/2; ↓)</li> <li>• Hospital Admissions (e1/2; ↓)</li> </ul>                                                                                         |
| Earlier Discharge with Community-Based Intervention, Winnipeg, MB, Canada <sup>31</sup>           | Low birth weight infants | <ul style="list-style-type: none"> <li>○ Early discharge with follow-up in the community <ul style="list-style-type: none"> <li>▪ Public health nurse &amp; homemaker services for 8 weeks post-discharge</li> <li>▪ Assessment</li> </ul> </li> </ul>                                                                                                                                                                                    | RCT | 29 | <ul style="list-style-type: none"> <li>• Length of Hospital Stay (e1/e2; ↓)</li> <li>• Rehospitalization Rate (e1/e2; ∅)</li> <li>• Illness Rate (e2; ∅)</li> <li>• Health Care Team Home Visits/Phone Contacts</li> </ul> |

|                                                                                                |        |                                                                                                                                                                                                                                      |     |    |                                                                                                                                                                                                                                                                                                                                                                                                                                                                                                                                                                                                           |
|------------------------------------------------------------------------------------------------|--------|--------------------------------------------------------------------------------------------------------------------------------------------------------------------------------------------------------------------------------------|-----|----|-----------------------------------------------------------------------------------------------------------------------------------------------------------------------------------------------------------------------------------------------------------------------------------------------------------------------------------------------------------------------------------------------------------------------------------------------------------------------------------------------------------------------------------------------------------------------------------------------------------|
|                                                                                                |        | <p>, education, support &amp; referral/liason to other services</p> <ul style="list-style-type: none"> <li>▪ Home visit or telephone contact</li> <li>▪ Nurse always available</li> </ul> <p>○ Control group: standard discharge</p> |     |    | <p>(e1/e2/p; ↑)</p> <ul style="list-style-type: none"> <li>• Physical Development (e1; ∅)</li> <li>• Quality of the Home Environment (e1;p ↑)</li> <li>• Program Cost (e2; ↓)</li> </ul>                                                                                                                                                                                                                                                                                                                                                                                                                  |
| Home and Ambulatory Program for Asthmatic Children, Halifax, Nova Scotia, Canada <sup>32</sup> | Asthma | <p>○ Comprehensive home &amp; ambulatory program</p> <ul style="list-style-type: none"> <li>▪ Education &amp; home visits by specially trained nurse</li> </ul> <p>○ Control group: continued to received standard care</p>          | RCT | 29 | <ul style="list-style-type: none"> <li>• Illness Severity (e1;↓)</li> <li>• Illness Symptoms (e1; ∅)</li> <li>• Medication Requirements (e1; ∅)</li> <li>• Primary Care Physician Visits (e1/e2; ↓)</li> <li>• Hospital Admissions (e1/e2; ∅)</li> <li>• Multiple Hospital Admissions (e1/e2; ↓)</li> <li>• Length of Hospital Stay (e1/e2; ∅)</li> <li>• Pulmonary Function (e1; ↑)</li> <li>• School Absenteeism (e1;↓)</li> <li>• Metered Aerosol Technique (e1; ↑)</li> <li>• Reduction of Smokers Living at Home (e1; ∅)</li> <li>• Reduction in Number of Pets (e1; ∅)</li> <li>• Asthma</li> </ul> |

|                                                           |                  |                                                                                                                                                                                                                                                                                                                                                                                                                                                                                                                                                                                                                                                             |     |    |                                                                                                                                                                                                                                                                                                                                                                                                                                                                                                                                                                                                              |
|-----------------------------------------------------------|------------------|-------------------------------------------------------------------------------------------------------------------------------------------------------------------------------------------------------------------------------------------------------------------------------------------------------------------------------------------------------------------------------------------------------------------------------------------------------------------------------------------------------------------------------------------------------------------------------------------------------------------------------------------------------------|-----|----|--------------------------------------------------------------------------------------------------------------------------------------------------------------------------------------------------------------------------------------------------------------------------------------------------------------------------------------------------------------------------------------------------------------------------------------------------------------------------------------------------------------------------------------------------------------------------------------------------------------|
|                                                           |                  |                                                                                                                                                                                                                                                                                                                                                                                                                                                                                                                                                                                                                                                             |     |    | <ul style="list-style-type: none"> <li>Education Questionnaire (e1; ↑)</li> <li>• Family Satisfaction with Care (p; ∅)</li> <li>• Family Wanting More Information (p; ↓)</li> </ul>                                                                                                                                                                                                                                                                                                                                                                                                                          |
| Home-Based Management, Montreal, QC, Canada <sup>33</sup> | Type 1 diabetes  | <ul style="list-style-type: none"> <li>○ Hospital-based intervention                             <ul style="list-style-type: none"> <li>▪ Patients remained in hospital for metabolic stabilization &amp; initial insulin therapy</li> <li>▪ Education by nurse, dietician, &amp; diabetologist with additional sessions as needed</li> </ul> </li> <li>○ Home-based intervention                             <ul style="list-style-type: none"> <li>▪ In addition, diabetes treatment nurse accompanied family home</li> <li>▪ Offered flexible education sessions</li> <li>▪ Implemented insulin treatment plan with diabetologist</li> </ul> </li> </ul> | RCT | 28 | <ul style="list-style-type: none"> <li>• Metabolic Control (e1; ↑)</li> <li>• Illness Related Adverse Events (e1/s; ∅)</li> <li>• Parents' Knowledge of Child's Condition (p; ∅)</li> <li>• Parent/Child Adherence to Treatment (p; ∅)</li> <li>• Impact of Child's Illness on Family (p; ∅)</li> <li>• Parental Perceived Stress (p; ∅)</li> <li>• Family Satisfaction with Care (p; ∅)</li> <li>• Child Stress Scale (e1; ↑)</li> <li>• Parental Out-of-Pocket Expenses (e2; ↓)</li> <li>• Parental Time Spent with Hospitalized Child (p; ↓)</li> <li>• Parental Hours Missed from Work (p; ∅)</li> </ul> |
| After Care                                                | Low birth weight | ○ Home health                                                                                                                                                                                                                                                                                                                                                                                                                                                                                                                                                                                                                                               | RCT | 28 | <ul style="list-style-type: none"> <li>• Emergency</li> </ul>                                                                                                                                                                                                                                                                                                                                                                                                                                                                                                                                                |



|                                                                                                              |                             |                                                                                                                                                                                                                                                                                                                                                                                                                                                                                                                                                                                                                                       |            |           |                                                                                                                                                                            |
|--------------------------------------------------------------------------------------------------------------|-----------------------------|---------------------------------------------------------------------------------------------------------------------------------------------------------------------------------------------------------------------------------------------------------------------------------------------------------------------------------------------------------------------------------------------------------------------------------------------------------------------------------------------------------------------------------------------------------------------------------------------------------------------------------------|------------|-----------|----------------------------------------------------------------------------------------------------------------------------------------------------------------------------|
| <p>Services, Los Angeles, CA, USA<sup>34</sup></p>                                                           | <p>infants</p>              | <p>intervention</p> <ul style="list-style-type: none"> <li>▪ Provided critical home care in first 1 to 4 weeks post-discharge</li> <li>▪ Physician available for consult 24hours/day</li> <li>○ Home visit intervention             <ul style="list-style-type: none"> <li>▪ Provided prevention &amp; intervention services</li> <li>▪ Focus on development &amp; health monitoring of infant, parental support &amp; social service referrals</li> <li>▪ First 2 years post-discharge</li> </ul> </li> <li>○ Home health &amp; home visit combined intervention</li> <li>○ Control group: received no in-home assistance</li> </ul> |            |           | <p>Department Visits (e1/e2; ∅)</p> <ul style="list-style-type: none"> <li>• Rehospitalization (e1/e2; ∅)</li> <li>• Immunization Status (e1; ↑)</li> </ul>                |
| <p>Follow-up Care for Infants with Chronic Lung Disease, Winston-Salem, North Carolina, USA<sup>35</sup></p> | <p>Chronic lung disease</p> | <ul style="list-style-type: none"> <li>○ Community-based follow-up             <ul style="list-style-type: none"> <li>▪ Nurse specialist monitored infants' &amp; parents' health &amp; resources use</li> <li>▪ Made referrals</li> </ul> </li> <li>○ Center-based follow-up             <ul style="list-style-type: none"> <li>▪ Visits to a medical multidisciplinary clinic</li> <li>▪ Developed</li> </ul> </li> </ul>                                                                                                                                                                                                           | <p>RCT</p> | <p>34</p> | <ul style="list-style-type: none"> <li>• Physical and Mental Development (e1; ∅)</li> <li>• Rehospitalization (e1/e2; ∅)</li> <li>• Respiratory Illness (e1; ∅)</li> </ul> |

|                                                                               |                                        |                                                                                                                                                                                                                                                                                                                                                                          |             |    |                                                                                                                                                                                                |
|-------------------------------------------------------------------------------|----------------------------------------|--------------------------------------------------------------------------------------------------------------------------------------------------------------------------------------------------------------------------------------------------------------------------------------------------------------------------------------------------------------------------|-------------|----|------------------------------------------------------------------------------------------------------------------------------------------------------------------------------------------------|
|                                                                               |                                        | <ul style="list-style-type: none"> <li>▪ plan of care</li> <li>▪ Update letter to PCP following visits</li> </ul>                                                                                                                                                                                                                                                        |             |    |                                                                                                                                                                                                |
| Military Community Asthma Program (MilCAP), Honolulu, HI, USA <sup>36</sup>   | Asthma                                 | <ul style="list-style-type: none"> <li>○ Run by team coordinator, parent educator &amp; pulmonologist</li> <li>○ Outpatient management plan</li> <li>○ Education</li> <li>○ Additional outpatient intervention for some families</li> </ul>                                                                                                                              | Pre/Post    | 19 | <ul style="list-style-type: none"> <li>• Hospital Admissions (e1/e2; ↓)</li> </ul>                                                                                                             |
| CLT, London, UK <sup>37</sup>                                                 | Visual impairment/ophthalmic disorders | <ul style="list-style-type: none"> <li>○ Hospital-based community link team members</li> <li>○ Accompanied families during assessments</li> <li>○ Reinforced &amp; clarified clinical information</li> <li>○ Advised families about visual stimulation programs</li> <li>○ Education &amp; social services information</li> <li>○ First contact point parents</li> </ul> | Pre/Post    | 23 | <ul style="list-style-type: none"> <li>• Family-Centeredness of Care (p; ∅)</li> <li>• Family Satisfaction with Care (p; ↑)</li> </ul>                                                         |
| Comprehensive Clinical Care Program, Cotonou, Republic of Benin <sup>38</sup> | Sickle Cell Disease                    | <ul style="list-style-type: none"> <li>○ Intensive parental education &amp; information sessions</li> <li>○ Education was repeated with encouragement for <ul style="list-style-type: none"> <li>▪ Vaccination</li> <li>▪ Attending appointments</li> <li>▪ Improving nutrition</li> <li>▪ Malaria prophylaxis</li> </ul> </li> </ul>                                    | Pre/Post    | 27 | <ul style="list-style-type: none"> <li>• Disease-Related Acute Events (e1; ↓)</li> <li>• General Status and Physical Growth (e1; ↑)</li> <li>• Hospitalization Frequency (e1/e2; ↓)</li> </ul> |
| Multidisciplinary Clinic for                                                  | Epilepsy                               | <ul style="list-style-type: none"> <li>○ Medical management</li> </ul>                                                                                                                                                                                                                                                                                                   | Descriptive | 26 | <ul style="list-style-type: none"> <li>• Family Satisfaction</li> </ul>                                                                                                                        |

|                                                                          |                                                                         |                                                                                                                                                                                                                                                                                                                                                                                                                  |                      |    |                                                                                                                                                                                                         |
|--------------------------------------------------------------------------|-------------------------------------------------------------------------|------------------------------------------------------------------------------------------------------------------------------------------------------------------------------------------------------------------------------------------------------------------------------------------------------------------------------------------------------------------------------------------------------------------|----------------------|----|---------------------------------------------------------------------------------------------------------------------------------------------------------------------------------------------------------|
| Children with Epilepsy, Little Rock, AR, USA <sup>39</sup>               |                                                                         | <ul style="list-style-type: none"> <li>○ Treatment plan involving optimal service control &amp; multifaceted education</li> <li>○ Direct intervention for psychosocial difficulties</li> </ul>                                                                                                                                                                                                                   |                      |    | with Care (p; ↑)                                                                                                                                                                                        |
| The Ocular Genetics Program, Toronto, ON, Canada <sup>40</sup>           | Ocular genetics diseases                                                | <ul style="list-style-type: none"> <li>○ Comprehensive &amp; multidisciplinary hospital-based care</li> <li>○ Centralized medical services, leading-edge molecular diagnosis</li> <li>○ Goal to minimize visits</li> <li>○ Optimized use of alternative care-givers &amp; diverse resources</li> </ul>                                                                                                           | Descriptive          | 19 | <ul style="list-style-type: none"> <li>● Family Satisfaction with Care (p; ↑)</li> </ul>                                                                                                                |
| The Cystic Fibrosis Outreach Services (CFOS), Brisbane, AU <sup>41</sup> | Cystic Fibrosis                                                         | <ul style="list-style-type: none"> <li>○ Outreach in seven remote sites</li> <li>○ Multidisciplinary team: <ul style="list-style-type: none"> <li>▪ Respiratory physician, physiotherapist, dietitian and nurse</li> <li>▪ Local paediatricians, general practitioners and/or health workers</li> </ul> </li> <li>○ Clinics occur at least once per year</li> <li>○ Control group: Tertiary CF centre</li> </ul> | Retrospective Cohort | 34 | <ul style="list-style-type: none"> <li>● Pulmonary Function (e1; ∅)</li> <li>● Sputum Bacteriology (e1; ∅)</li> <li>● Physical Development (e1; ∅)</li> <li>● Hospital Admissions (e1/e2; ↓)</li> </ul> |
| <b>(B) Non-Categorical Patient Populations</b>                           |                                                                         |                                                                                                                                                                                                                                                                                                                                                                                                                  |                      |    |                                                                                                                                                                                                         |
| Pediatric Home Care, Bronx, NY, USA <sup>17,19,42</sup>                  | Diverse chronic physical conditions including sick cell anemia, asthma, | <ul style="list-style-type: none"> <li>○ Community &amp; hospital based intervention <ul style="list-style-type: none"> <li>▪ Multidisciplin</li> </ul> </li> </ul>                                                                                                                                                                                                                                              | RCT                  | 32 | <ul style="list-style-type: none"> <li>● Family Satisfaction with Care (p; ↑)</li> </ul>                                                                                                                |

|                                                                                             |                                                                                      |                                                                                                                                                                                                                                                                                                                                                         |                    |    |                                                                                                                                                                                                                                        |
|---------------------------------------------------------------------------------------------|--------------------------------------------------------------------------------------|---------------------------------------------------------------------------------------------------------------------------------------------------------------------------------------------------------------------------------------------------------------------------------------------------------------------------------------------------------|--------------------|----|----------------------------------------------------------------------------------------------------------------------------------------------------------------------------------------------------------------------------------------|
|                                                                                             | diabetes, leukemia, juvenile rheumatoid arthritis and congenital conditions          | <ul style="list-style-type: none"> <li>ary team <ul style="list-style-type: none"> <li>▪ Comprehensive services, case management, coordination of services, monitoring, direct care, education &amp; advocacy</li> </ul> </li> <li>○ Control group: standard care</li> </ul>                                                                            |                    |    | <ul style="list-style-type: none"> <li>• Child's Psychological Adjustment (e1/e2; ↑)</li> <li>• Parents' Well-Being (p; ↑)</li> <li>• Child's Function Status (e1; ∅)</li> <li>• Impact of Child's Illness on Family (p; ∅)</li> </ul> |
| Project CATCH, Columbus, OH, USA <sup>43</sup>                                              | Infants with moderate to severe bronchopulmonary dysplasia or neurologic dysfunction | <ul style="list-style-type: none"> <li>○ Hospital run community-based <ul style="list-style-type: none"> <li>▪ Multidisciplinary transition team</li> </ul> </li> <li>○ Control group: standard discharge &amp; follow-up</li> </ul>                                                                                                                    | RCT                | 26 | <ul style="list-style-type: none"> <li>• Services Accessed by Families (p; ↑)</li> <li>• Parental Social Support (p; ↑)</li> <li>• Physical and Mental Development (e1; ↑)</li> </ul>                                                  |
| Integrated Health Care Program for Children with Special Needs, Michigan, USA <sup>44</sup> | Severe, chronic or handicapping conditions                                           | <ul style="list-style-type: none"> <li>○ Hospital only integrated clinic <ul style="list-style-type: none"> <li>▪ Collaborative interdisciplinary model of care</li> <li>▪ Visits in 1 place/ time</li> <li>▪ Non-medical interventions</li> <li>▪ Yearly comprehensive evaluation</li> </ul> </li> <li>○ Control group: traditional clinics</li> </ul> | Prospective Cohort | 30 | <ul style="list-style-type: none"> <li>• Child Behaviour (e1; ↑)</li> <li>• Parental Coping and Well-Being (p; ∅)</li> <li>• Child Coping and Well-Being (e1; ∅)</li> </ul>                                                            |
| Project Continuity, Omaha, NE, USA <sup>55</sup>                                            | Infants with developmental disabilities or chronic conditions                        | <ul style="list-style-type: none"> <li>○ Hospital-based comprehensive care coordination intervention</li> <li>○ Individual &amp; team care management</li> <li>○ Assessment of family's needs &amp; priorities</li> <li>○ Intervention plan</li> </ul>                                                                                                  | Descriptive        | 22 | <ul style="list-style-type: none"> <li>• Timely access to Appropriate Services (t; ↑)</li> <li>• Parents' Knowledge of Child's Condition (p; ↑)</li> <li>• Parents' Participation</li> </ul>                                           |

|                                                                        |                                                                                                                                                                                                                                                                                                                   |                                                                                                                                                                                                                                           |             |    |                                                                                                                                                                                       |
|------------------------------------------------------------------------|-------------------------------------------------------------------------------------------------------------------------------------------------------------------------------------------------------------------------------------------------------------------------------------------------------------------|-------------------------------------------------------------------------------------------------------------------------------------------------------------------------------------------------------------------------------------------|-------------|----|---------------------------------------------------------------------------------------------------------------------------------------------------------------------------------------|
|                                                                        |                                                                                                                                                                                                                                                                                                                   | <ul style="list-style-type: none"> <li>o developed</li> <li>o Referrals to other agencies</li> <li>o Follow-up care for care continuity &amp; community transition</li> </ul>                                                             |             |    | in Child's Care (p; ↑)                                                                                                                                                                |
| SABH Project, Stockholm, Sweden <sup>56</sup>                          | Infants with congenital malformations, premature infants in need of oxygen therapy and tube feeding, children with severe burn injuries, patients in advanced post-surgical care, multi-handicapped with acute complications, who were failing to thrive, oncological patients and those requiring terminal care. | <ul style="list-style-type: none"> <li>o Hospital-managed advanced inpatient medical care at home</li> <li>o 24 hour support from paediatricians &amp; specialized medical staff</li> </ul>                                               | Descriptive | 16 | <ul style="list-style-type: none"> <li>• Hospital Admissions (e1/e2; ↓)</li> </ul>                                                                                                    |
| Comprehensive Ambulatory Services, Rochester, NY, USA <sup>57</sup>    | Chronic conditions as defined by the International Classification of Diseases, Ninth Revision, Clinical Modification                                                                                                                                                                                              | <ul style="list-style-type: none"> <li>o Multidisciplinary team to expand ambulatory care coordination &amp; provide 'wraparound' services</li> </ul>                                                                                     | Descriptive | 27 | <ul style="list-style-type: none"> <li>• Length of Hospital Stay (e1/e2; ↓)</li> <li>• Hospital Admissions (e1/e2; ↓)</li> <li>• Hospital Charges (e2; ↓)</li> </ul>                  |
| Special Primary Care Clinic, Denver, CO, USA <sup>45</sup>             | Multisystem disorders behavioural/mental health, developmental delay and chromosomal/congenital diagnoses                                                                                                                                                                                                         | <ul style="list-style-type: none"> <li>o Hospital-based multidisciplinary team</li> <li>o Comprehensive primary care clinic</li> <li>o Care coordination &amp; case management</li> </ul>                                                 | Pre/Post    | 29 | <ul style="list-style-type: none"> <li>• Length of Hospital Stay (e1/e2; ↓)</li> <li>• Use of Needed Services (e1; ↑)</li> </ul>                                                      |
| Pediatric Alliance for Coordinated Care, Boston, MA, USA <sup>46</sup> | Mental disorders, diseases of nervous system/sense organs, conditions originating in prenatal period, congenital abnormalities and symptoms, signs, ill-defined conditions and organ-specific conditions.                                                                                                         | <ul style="list-style-type: none"> <li>o Joint hospital &amp; community intervention</li> <li>o Pediatric primary care providers &amp; specialist providing integrated care</li> <li>o Managed by pediatric nurse practitioner</li> </ul> | Pre/Post    | 33 | <ul style="list-style-type: none"> <li>• Ease of family care delivery (e1; ↑)</li> <li>• Access to Medical Team/Resources (e1; ↑)</li> <li>• Parents' Knowledge of Child's</li> </ul> |

|                                                                                |                                                                                                                                                                    |                                                                                                                                                                                                                       |          |    |                                                                                                                                                                                                                                                                |
|--------------------------------------------------------------------------------|--------------------------------------------------------------------------------------------------------------------------------------------------------------------|-----------------------------------------------------------------------------------------------------------------------------------------------------------------------------------------------------------------------|----------|----|----------------------------------------------------------------------------------------------------------------------------------------------------------------------------------------------------------------------------------------------------------------|
|                                                                                |                                                                                                                                                                    | <ul style="list-style-type: none"> <li>○ Individualized health plan developed &amp; shared with stakeholders</li> </ul>                                                                                               |          |    | <ul style="list-style-type: none"> <li>Condition (p; ↑)</li> <li>• Family Satisfaction with Care (p; ↑)</li> <li>• Relationship with Medical Team (p; ↑)</li> <li>• Parental Days Missed from Work (p; ↓)</li> <li>• Hospital Admissions (e1/e2; ↓)</li> </ul> |
| Accelerated Care through Emergency Program, Melbourne, Australia <sup>47</sup> | Complex health care needs with underlying neurological problems, cared for by child development and rehabilitation service, multiple medical or ancillary services | <ul style="list-style-type: none"> <li>○ Hospital-based ED program</li> <li>○ 24-hour care with nurses in conjunction with subspecialists</li> <li>○ Clinical pathway with individual care plans developed</li> </ul> | Pre/Post | 29 | <ul style="list-style-type: none"> <li>• Family Satisfaction with Care (p; ↑)</li> <li>• Avoided Emergency Department Visits (e1/e2; ↑)</li> <li>• Program Cost Savings (e2; ↑)</li> <li>• Emergency Department Wait Times (t; ∅)</li> </ul>                   |
| Access to Better Care Program, Columbus, OH, USA <sup>48</sup>                 | Special health care needs including sickle cell anemia and cerebral palsy                                                                                          | <ul style="list-style-type: none"> <li>○ Staffed by community- &amp; hospital-based physicians &amp; case managers (social workers/clinical nurse specialists)</li> <li>○ 24 hour phone line</li> </ul>               | Pre/Post | 26 | <ul style="list-style-type: none"> <li>• Parents' Knowledge of Child's Condition (p; ↑)</li> <li>• Family Satisfaction with Care (p; ↑)</li> <li>• Hospital Admissions (e1/e2; ↓)</li> <li>• Program Cost Savings (e2; ∅)</li> </ul>                           |
| Children with Special Needs Disease Management Program,                        | Juvenile-onset diabetes; Sickle cell disease; Complex congenital heart disease; neurological devastation; Genetic                                                  | <ul style="list-style-type: none"> <li>○ Staffed by advanced practice nurse case managers</li> <li>○ Assessments completed to</li> </ul>                                                                              | Pre/Post | 21 | <ul style="list-style-type: none"> <li>• Family Satisfaction with Care (p; ↑)</li> <li>• Hospital Admissions</li> </ul>                                                                                                                                        |

|                                                                                |                                                                                                                                                               |                                                                                                                                                                                                                                                                                                                                                                                                                |          |    |                                                                                                                                                                                                                                      |
|--------------------------------------------------------------------------------|---------------------------------------------------------------------------------------------------------------------------------------------------------------|----------------------------------------------------------------------------------------------------------------------------------------------------------------------------------------------------------------------------------------------------------------------------------------------------------------------------------------------------------------------------------------------------------------|----------|----|--------------------------------------------------------------------------------------------------------------------------------------------------------------------------------------------------------------------------------------|
| Baltimore, MD, USA <sup>49</sup>                                               | syndromes; Multiple comorbidities                                                                                                                             | <ul style="list-style-type: none"> <li>develop care plan to meet short- &amp; long-term goals</li> <li>○ Coordination, facilitation of communication &amp; collaboration, advocating for patients/families</li> </ul>                                                                                                                                                                                          |          |    | <ul style="list-style-type: none"> <li>(e1/e2; ↓)</li> <li>• Length of Hospital Stay (e1/e2; ↓)</li> <li>• Program Cost (e2; ↓)</li> <li>• Program Cost Savings (e2; ↑)</li> <li>• Emergency Department Visits (e1/e2; ↑)</li> </ul> |
| Tertiary Care-Primary Care Partnership Model, Milwaukee, WI, USA <sup>50</sup> | Wide ranging chronic disorders involving multiple specialists, organ systems, unknown or uncertain diagnoses, multiple hospital admissions and medical visits | <ul style="list-style-type: none"> <li>○ Care coordination provided by nurse case manager <ul style="list-style-type: none"> <li>▪ Children with more frequent/longer hospitalizations were also treated by MD</li> </ul> </li> <li>○ Single point of contact at hospital between patients/families, PCPs &amp; community resources</li> <li>○ Care plans developed</li> <li>○ Psychosocial support</li> </ul> | Pre/Post | 31 | <ul style="list-style-type: none"> <li>• Hospital Admissions (e1/e2; ↓)</li> <li>• Number of Hospital Days (e1/e2; ↓)</li> <li>• Hospital Charges (e2; ↓)</li> <li>• Use of Outpatient Services (e1/e2; ↑)</li> </ul>                |
| Chronic Complex Center, Tampa, Florida, USA <sup>51</sup>                      | Diverse; most commonly asthma, convulsions, cerebral palsy, cystic fibrosis, and lack/delay of physiological development                                      | <ul style="list-style-type: none"> <li>○ Hospital-based medical home</li> </ul>                                                                                                                                                                                                                                                                                                                                | Pre/Post | 17 | <ul style="list-style-type: none"> <li>• Emergency room visits (e1/2; ↓)</li> <li>• Hospital admissions (e1/2; ↓)</li> <li>• Hospital days (e1/2; ↓)</li> <li>• Costs (e2; ↓)</li> </ul>                                             |
| Complex Care Clinic, Toronto, ON, Canada <sup>52</sup>                         | ≤ 18 yo with chronic health problems expected to continue for at least 12 months, that affected multiple organ systems, requiring treatment with              | <ul style="list-style-type: none"> <li>○ Staffed by pediatrician and nurse practitioner focusing on management and coordination</li> </ul>                                                                                                                                                                                                                                                                     | Pre/Post | 30 | <ul style="list-style-type: none"> <li>• Hospitalized days (e1/2; ↓)</li> <li>• Hospitalizations (e1/2; ∅)</li> <li>• Emergency department visits (e1/2; ∅)</li> <li>• Hospital</li> </ul>                                           |

|                                                                       |                                                                                                                                                                                                                                                                                                                                                                      |                                                                                                                                                                                                                                                                                                                                  |          |    |                                                                                                                                                                                                                                                             |
|-----------------------------------------------------------------------|----------------------------------------------------------------------------------------------------------------------------------------------------------------------------------------------------------------------------------------------------------------------------------------------------------------------------------------------------------------------|----------------------------------------------------------------------------------------------------------------------------------------------------------------------------------------------------------------------------------------------------------------------------------------------------------------------------------|----------|----|-------------------------------------------------------------------------------------------------------------------------------------------------------------------------------------------------------------------------------------------------------------|
|                                                                       | multiple prescription medications and/or technological therapies, ongoing care by multiple medical sub-specialists and multiple allied health professionals in multiple health care settings. Excluded children enrolled in a comprehensive multi-disciplinary program for a single disease entity and children whose parents were unable to communicate in English. | <ul style="list-style-type: none"> <li>○ Comprehensive ambulatory follow-up in coordination with the child's primary care physician</li> <li>○ Written care plans</li> <li>○ Communication by e-mail or phone whenever possible</li> </ul>                                                                                       |          |    | <p>outpatient visits (e1/2; ↑)</p> <ul style="list-style-type: none"> <li>● Community outpatient visits (e1/2; ∅)</li> <li>● Parental QOL (p; ↑)</li> <li>● Family-centredness of care (p; ↑)</li> <li>● Parental satisfaction (p; ↑)</li> </ul>            |
| U Special Kids Program, Minneapolis, Minnesota, USA <sup>53</sup>     | Four or more chronic medical problems, multiple medical specialists, numerous or rare medications, repeated hospitalizations and/or emergency room visits, technology dependence, needs not met by another service                                                                                                                                                   | <ul style="list-style-type: none"> <li>○ Coordinates communication between family, tertiary care services, social services, primary care provider, specialists, schools, insurers.</li> <li>○ Documentation in electronic health record</li> <li>○ Issues addressed by telephone when possible</li> </ul>                        | Pre/Post | 27 | <ul style="list-style-type: none"> <li>● Unplanned admissions/days (e1/2; ↓)</li> <li>● Planned admissions/day (e1/2; ∅)</li> </ul>                                                                                                                         |
| Pediatric Medical Home Program at UCLA, Los Angeles, CA <sup>54</sup> | ≥1 yo who see at least 2 different subspecialists on an ongoing basis; excludes solid organ transplant and patients seen in adolescent continuity settings.                                                                                                                                                                                                          | <ul style="list-style-type: none"> <li>○ 60 minute initial visit for comprehensive evaluation</li> <li>○ Follow-up appointments twice the length of standard visits</li> <li>○ "Family Liaison" served as primary contact for families, attended appointment, provided translation services and coordinated follow-up</li> </ul> | Pre/Post | 28 | <ul style="list-style-type: none"> <li>● ED visits (e1/2; ↓)</li> <li>● Outpatient visits (e1/2; ∅)</li> <li>● Urgent care visits (e1/2; ∅)</li> <li>● Hospital admissions (e1/2; ∅)</li> <li>● Hospital days (e1/2; ∅)</li> <li>● LOS (e1/2; ∅)</li> </ul> |



|  |  |                                                                                                    |  |  |  |
|--|--|----------------------------------------------------------------------------------------------------|--|--|--|
|  |  | appointments and procedures<br>○ "All About Me" binder containing comprehensive health information |  |  |  |
|--|--|----------------------------------------------------------------------------------------------------|--|--|--|

Abbreviations: e1, effectiveness of care; e2, efficiency of care; e3, equity of care; p, patient/family centeredness; s, patient safety; t, timeliness; ↓, decrease in outcome measure; ↑, increase in outcome measure; ∅, no change in outcome measure.
